# Supplementary material
Source: MDPI journal article supplement (https://www.mdpi.com/2079-9276/12/1/14)
Supplement: s1 [file s1]

Table S3. Hydrochemical characterization of water samples.

|                                              |        |                 |                    | Geo_Thermometers |                  |                         |                    |                    |                     |                    | D'Amore indexes |       |       |       |        |       | Ionic ratios |       |      |       |          |         |        | Facies |          |          |
|----------------------------------------------|--------|-----------------|--------------------|------------------|------------------|-------------------------|--------------------|--------------------|---------------------|--------------------|-----------------|-------|-------|-------|--------|-------|--------------|-------|------|-------|----------|---------|--------|--------|----------|----------|
| Name                                         | Sample | (mg/L<br>CaCO3) | Langelier<br>Index |                  | 0-250<br>SiO2 QZ | >100-2000<br>SiO2 QZ SL | 0-250<br>SiO2 CRIA | 0-250<br>SiO2 CRIB | 0-250<br>Caldedonia | >100<br>K/Mg GIG83 |                 | A     | B     | C     | D      | E     | F            | Mg/Ca | K/Na | Na/Ca | Na/Ca+Mg | Cl/HCO3 | SO4/Cl | icb(-) | Anionic  | Cationic |
| Río Covalagua                                | 2      | 257,7           | 0,4                |                  | 104,4            | 104,8                   | 53,9               | 7,1                | 74,6                |                    |                 | 88,94 | 2,78  | -0,53 | -6,19  | 4,96  | 88,83        | 0,09  | 0,00 | 0,02  | 0,02     | 0,02    | 2,03   | 0,00   | HCO3     | Ca       |
| Arroyo que desemboca en el Rudrón            | 4      | 216,3           | 0,0                |                  | 90,4             | 92,6                    | 40,3               | (--)               | 59,7                | 35,8               |                 | 92,47 | -1,93 | -2,81 | -35,06 | 1,49  | 51,86        | 0,67  | 0,78 | 0,05  | 0,03     | 0,06    | 0,16   | 0,00   | HCO3     | Ca Mg    |
| Manantial de la Cárcava                      | 6      | 216,8           | -0,5               |                  | 88,3             | 90,8                    | 38,2               | (--)               | 57,5                | (--)               |                 | 70,69 | 2,63  | -1,87 | -8,34  | 11,35 | 68,40        | 0,21  | 0,07 | 0,10  | 0,08     | 0,11    | 1,08   | 0,01   | HCO3     | Ca       |
| Fuenteodra                                   | 7      | 373,0           | 0,1                |                  | 73,2             | 77,6                    | 23,7               | (--)               | 41,6                | 66,6               |                 | 61,92 | 10,08 | -6,38 | -9,66  | 18,37 | 74,92        | 0,17  | 0,50 | 0,05  | 0,04     | 0,13    | 1,36   | 0,04   | HCO3     | Ca       |
| Arroyo Congosto                              | 8      | 261,5           | -0,2               |                  | 73,2             | 77,6                    | 23,7               | (--)               | 41,6                | (--)               |                 | 32,11 | 15,27 | 1,58  | -7,47  | 26,24 | 52,75        | 0,31  | 0,03 | 0,20  | 0,15     | 0,19    | 2,48   | -0,02  | HCO3     | Ca       |
| Río Villova                                  | 9      | 215,9           | -0,1               |                  | 44,2             | 51,7                    | (--)               | (--)               | 11,5                |                    |                 | 83,09 | -1,66 | 4,71  | -9,16  | 1,94  | 65,89        | 0,24  | 0,00 | 0,11  | 0,09     | 0,04    | 1,85   | -0,05  | HCO3     | Ca       |
| Arroyo de las Udrias                         | 11     | 308,8           | 0,3                |                  | 106,3            | 106,4                   | 55,8               | 8,8                | 76,7                | (--)               |                 | 82,51 | 4,56  | -2,19 | -21,34 | 8,40  | 71,67        | 0,32  | 0,20 | 0,03  | 0,02     | 0,05    | 1,56   | 0,02   | HCO3     | Ca       |
| Río Rubagón                                  | 12     | 310,9           | 0,7                |                  | 186,4            | 173,4                   | 137,0              | 87,1               | 166,3               | 115,7              |                 | 63,62 | 6,21  | -6,85 | -2,69  | 15,03 | 72,74        | 0,10  | 0,65 | 0,07  | 0,06     | 0,17    | 0,95   | 0,02   | HCO3     | Ca       |
| Arroyo de Mundilla (Villaescobedo)           | 13     | 201,1           | 0,3                |                  | 46,8             | 54,1                    | (--)               | (--)               | 14,2                |                    |                 | 77,02 | 7,55  | -1,52 | -11,91 | 11,19 | 81,74        | 0,17  | 0,00 | 0,03  | 0,02     | 0,04    | 2,66   | 0,01   | HCO3     | Ca       |
| Manantial de Fuentes (Barrio Panizares)      | 14     | 283,3           | 0,4                |                  | 135,6            | 131,4                   | 85,0               | 36,5               | 108,8               | 39,5               |                 | 73,13 | -4,29 | -6,68 | -3,36  | 10,77 | 65,44        | 0,17  | 0,13 | 0,13  | 0,11     | 0,21    | 0,33   | 0,05   | HCO3     | Ca       |
| Río Congostillo al Sur de talamillo del Tozo | 16     | 176,8           | -0,7               |                  | 51,9             | 58,7                    | 3,3                | (--)               | 19,5                |                    |                 | 83,92 | -8,67 | 2,36  | -6,52  | 0,90  | 57,71        | 0,26  | 0,00 | 0,17  | 0,14     | 0,11    | 0,34   | -0,03  | HCO3     | Ca       |
| Manantial La Piedra                          | 17     | 168,7           | 0,2                |                  | 33,1             | 41,7                    | (--)               | (--)               | 0,3                 |                    |                 | 83,13 | 7,98  | -0,90 | -9,76  | 8,88  | 90,24        | 0,11  |      | 0,00  | 0,00     | 0,01    | 8,86   | 0,01   | HCO3     | Ca       |
| Manantial de La Recova (Urbel del Castillo)  | 19     | 282,3           | 0,3                |                  | 104,4            | 104,8                   | 53,9               | 7,1                | 74,6                |                    |                 | 73,09 | 8,86  | -2,41 | -17,69 | 13,53 | 75,53        | 0,26  | 0,00 | 0,03  | 0,02     | 0,06    | 2,38   | 0,02   | HCO3     | Ca       |
| Fuente La Vieja (La Nuez de Arriba)          | 20     | 327,0           | -0,5               |                  | 96,5             | 97,9                    | 46,2               | (--)               | 66,2                | 9,4                |                 | 10,49 | 27,45 | 7,90  | -7,27  | 33,05 | 48,89        | 0,34  | 0,05 | 0,22  | 0,17     | 0,12    | 6,64   | -0,10  | HCO3 SO4 | Ca       |
| Manantial a la salida de Acedillo            | 21     | 184,2           | -0,6               |                  | 68,7             | 73,6                    | 19,3               | (--)               | 36,9                | 48,5               |                 | 22,61 | 18,85 | 14,09 | -3,48  | 20,47 | 38,30        | 0,37  | 0,12 | 0,31  | 0,22     | 0,06    | 9,59   | -0,18  | HCO3 SO4 | Ca       |
| Riachuelo en Coculina                        | 22     | 200,1           | -0,4               |                  | 75,5             | 79,6                    | 25,8               | (--)               | 43,9                | (--)               |                 | 65,29 | 2,33  | 4,38  | -8,42  | 8,86  | 56,01        | 0,29  | 0,05 | 0,17  | 0,13     | 0,09    | 1,95   | -0,06  | HCO3     | Ca       |
| 1er cauce crta de Reboledo de Traspeña       | 23     | 229,3           | 0,3                |                  | 68,7             | 73,6                    | 19,3               | (--)               | 36,9                |                    |                 | 87,37 | 2,30  | 0,27  | -12,94 | 4,79  | 78,75        | 0,19  | 0,00 | 0,03  | 0,03     | 0,03    | 2,03   | 0,00   | HCO3     | Ca       |
| Cauce km.13 Crta. Villadiego                 | 24     | 138,5           | -0,7               |                  | 68,7             | 73,6                    | 19,3               | (--)               | 36,9                | 39,5               |                 | 44,26 | 4,73  | 3,46  | -7,54  | 15,60 | 38,23        | 0,42  | 0,14 | 0,29  | 0,20     | 0,20    | 1,62   | -0,08  | HCO3     | Ca       |
| Río de los Ordejones. Cauce crta             | 25     | 183,6           | -0,3               |                  | 41,5             | 49,3                    | (--)               | (--)               | 8,8                 |                    |                 | 87,17 | 6,01  | -0,81 | -15,69 | 6,82  | 84,31        | 0,19  |      | 0,00  | 0,00     | 0,01    | 7,38   | 0,01   | HCO3     | Ca       |
| Arroyo Sahuguillo                            | 26     | 259,2           | -0,2               |                  | 102,4            | 103,1                   | 52,0               | 5,3                | 72,5                | 125,3              |                 | 79,70 | 1,82  | 1,16  | -6,69  | 0,93  | 64,16        | 0,17  | 0,96 | 0,08  | 0,07     | 0,05    | 1,62   | -0,07  | HCO3     | Ca       |
| Arroyo de la Gargantilla (2º cauce           | 27     | 221,8           | -0,2               |                  | 56,9             | 63,1                    | 8,0                | (--)               | 24,6                |                    |                 | 91,90 | -4,25 | 5,23  | -8,21  | -2,20 | 69,96        | 0,20  | 0,00 | 0,09  | 0,08     | 0,02    | 1,48   | -0,06  | HCO3     | Ca       |
| Río Congosto en Villela                      | 28     | 230,3           | -0,4               |                  | 24,2             | 33,6                    | (--)               | (--)               | (--)                |                    |                 | 93,52 | 0,45  | -0,02 | -6,91  | 2,32  | 87,52        | 0,10  | 0,00 | 0,02  | 0,02     | 0,02    | 1,23   | 0,00   | HCO3     | Ca       |
| Río Pisuerga en Villela                      | 29     | 53,2            | -1,5               |                  | 231,3            | 209,3                   | 184,6              | 134,7              | 219,5               | 123,8              |                 | 56,49 | -1,59 | -1,18 | 3,70   | 4,06  | 36,78        | 0,18  | 0,71 | 0,24  | 0,20     | 0,23    | 0,83   | -0,12  | HCO3     | Ca       |
| Río Ritobas en crta PP-2134                  | 30     | 200,2           | -0,7               |                  | 241,4            | 217,2                   | 195,5              | 145,9              | 231,8               | 58,3               |                 | 88,57 | -1,63 | 0,42  | -10,20 | 0,62  | 69,97        | 0,20  | 0,47 | 0,07  | 0,05     | 0,05    | 0,74   | -0,03  | HCO3     | Ca       |
| Arroyo Vaillo en crta Aguilar                | 31     | 230,9           | -0,5               |                  | 36,0             | 44,3                    | (--)               | (--)               | 3,2                 | (--)               |                 | 65,05 | 11,49 | 1,47  | -12,46 | 13,97 | 73,06        | 0,22  | 0,12 | 0,06  | 0,05     | 0,04    | 5,31   | -0,02  | HCO3     | Ca       |
| Río Vegalizán en crta Aguilar                | 32     | 263,5           | 0,3                |                  | 121,3            | 119,3                   | 70,7               | 22,9               | 93,0                | 3,4                |                 | 84,87 | 3,77  | -0,38 | -8,21  | 6,08  | 83,62        | 0,12  | 0,20 | 0,03  | 0,02     | 0,03    | 2,21   | 0,00   | HCO3     | Ca       |
| Arroyo de Cozuelos (Cozuelos de Ojeda)       | 33     | 305,5           | 0,3                |                  | 102,4            | 103,1                   | 52,0               | 5,3                | 72,5                | (--)               |                 | 58,30 | 6,38  | -3,61 | -11,21 | 18,05 | 62,70        | 0,27  | 0,05 | 0,12  | 0,09     | 0,16    | 1,23   | 0,03   | HCO3     | Ca       |
| Arroyo Riachillo (Cozuelos)                  | 34     | 321,2           | 0,3                |                  | 17,9             | 27,8                    | (--)               | (--)               | (--)                |                    |                 | -0,26 | 46,15 | -1,97 | -20,61 | 50,12 | 73,41        | 0,30  | 0,00 | 0,03  | 0,02     | 0,08    | 12,14  | 0,02   | SO4 HCO3 | Ca       |
| Río Lucio (Villallano)                       | 35     | 340,3           | -0,4               |                  | 100,5            | 101,4                   | 50,1               | 3,4                | 70,4                | (--)               |                 | 18,97 | 37,82 | 2,06  | -19,84 | 37,88 | 71,98        | 0,30  | 0,15 | 0,03  | 0,03     | 0,01    | 95,21  | -0,03  | HCO3 SO4 | Ca       |
| Río Monegro (Santa María de Mave)            | 36     | 200,9           | -0,2               |                  | 30,2             | 39,1                    | (--)               | (--)               | (--)                |                    |                 | 91,78 | -3,44 | 3,21  | -13,13 | -0,55 | 68,56        | 0,26  | 0,00 | 0,08  | 0,06     | 0,03    | 0,92   | -0,04  | HCO3     | Ca       |
| Arroyo del Alambre                           | 41     | 248,4           | 0,5                |                  | 94,5             | 96,2                    | 44,2               | (--)               | 64,0                | (--)               |                 | 80,58 | 6,59  | -1,10 | -14,49 | 8,90  | 79,36        | 0,20  | 0,29 | 0,02  | 0,02     | 0,03    | 2,95   | 0,01   | HCO3     | Ca       |
| Manantial de la Pisadera                     | 42     | 225,1           | -0,3               |                  | 96,5             | 97,9                    | 46,2               | (--)               | 66,2                | 1,1                |                 | 75,40 | -0,57 | 0,58  | -4,50  | 7,11  | 68,17        | 0,17  | 0,06 | 0,11  | 0,10     | 0,10    | 1,00   | -0,01  | HCO3     | Ca       |
| Arroyo de Las Solanas                        | 47     | 191,8           | -0,5               |                  | 44,2             | 51,7                    | (--)               | (--)               | 11,5                |                    |                 | 77,38 | 7,27  | 1,79  | -15,38 | 8,77  | 74,74        | 0,24  | 0,00 | 0,04  | 0,03     | 0,02    | 7,01   | -0,02  | HCO3     | Ca       |
| Fuente de San Bol                            | 48     | 213,4           | -0,6               |                  | 84,1             | 87,2                    | 34,2               | (--)               | 53,0                |                    |                 | 63,75 | 10,76 | 2,57  | -12,41 | 13,96 | 70,30        | 0,24  | 0,00 | 0,08  | 0,06     | 0,04    | 5,17   | -0,03  | HCO3     | Ca       |
| Río Camesa                                   | 49     | 169,5           | -0,4               |                  | 64,1             | 69,5                    | 14,9               | (--)               | 32,0                |                    |                 | 76,55 | 6,83  | 1,33  | -10,32 | 9,21  | 78,55        | 0,17  | 0,00 | 0,05  | 0,04     | 0,03    | 4,43   | -0,01  | HCO3     | Ca       |
| Orbaneja-M-2                                 | 56     | 282,3           | 0,4                |                  | 82,0             | 85,3                    | 32,1               | (--)               | 50,8                | 16,0               |                 | 74,87 | 4,45  | -3,09 | -14,96 | 11,06 | 70,18        | 0,26  | 0,20 | 0,06  | 0,05     | 0,09    | 1,18   | 0,02   | HCO3     | Ca       |
| Río Rudrón en Valdelateja                    | 57     | 224,4           | 0,4                |                  | 41,5             | 49,3                    | (--)               | (--)               | 8,8                 |                    |                 | 84,15 | 5,68  | -4,49 | -11,00 | 10,17 | 89,00        | 0,12  |      | 0,00  | 0,00     | 0,05    | 1,27   | 0,05   | HCO3     | Ca       |
| Pozo Azul                                    | 58     | 278,2           | 0,3                |                  | 113,9            | 113,0                   | 63,4               | 15,9               | 85,0                |                    |                 | 67,81 | 10,73 | -1,63 | -15,61 | 15,39 | 75,28        | 0,24  | 0,00 | 0,04  | 0,03     | 0,06    | 2,95   | 0,02   | HCO3     | Ca       |
| Manantial de la Toba (Tubilla del Agua)      | 62     | 54,8            | -1,7               |                  | 177,0            | 165,8                   | 127,2              | 77,4               | 155,5               | 48,5               |                 | 53,47 | 8,44  | 1,02  | -9,11  | 13,64 | 52,22        | 0,29  | 0,39 | 0,15  | 0,12     | 0,13    | 2,03   | -0,06  | HCO3     | Ca       |
| Bañeario Valdelateja (M-2)                   | 64     | 364,9           | 0,4                |                  | 137,4            | 132,9                   | 86,8               | 38,2               | 110,7               | (--)               |                 | 78,57 | 8,69  | -4,06 | -31,47 | 12,40 | 67,83        | 0,46  |      | 0,00  | 0,00     | 0,05    | 2,14   | 0,04   | HCO3     | Ca       |
| Río Rudrón en Barrio Panizares               | 66     | 290,0           | 0,5                |                  | 151,0            | 144,3                   | 100,6              | 51,5               | 125,9               | 58,3               |                 | 80,13 | 3,23  | -2,74 | -7,20  | 7,86  | 78,79        | 0,13  | 0,47 | 0,04  | 0,04     | 0,07    | 1,08   | 0,01   | HCO3     | Ca       |
| Río Hurón (entrada a Cueva del Agua)         | 67     | 255,1           | 0,3                |                  | 94,5             | 96,2                    | 44,2               | (--)               | 64,0                |                    |                 | 86,94 | 3,20  | -1,63 | -11,01 | 6,50  | 83,96        | 0,15  | 0,00 | 0,02  | 0,02     | 0,0     |        |        |          |          |
