# Supplementary material
Source: MDPI journal article supplement (https://www.mdpi.com/2079-9276/12/1/14)
Supplement: s1 [file s1]

Table S2 Descriptive statistics of the chemical analysis of the waters of Las Loras

|                         | DQO   | Cl    | SO4     | HCO3    | NO3   | Na    | Mg    | Ca     | K     | pH     | C.E.     | NO2    | NH4    | PO4    | SiO2  | SiO2 QZ | SiO2 QZ SL | SiO2 CRIA | SiO2 CRIB | Caldedonia | AM Silica | K/Mg GIG83 |
|-------------------------|-------|-------|---------|---------|-------|-------|-------|--------|-------|--------|----------|--------|--------|--------|-------|---------|------------|-----------|-----------|------------|-----------|------------|
| Average                 | 3,98  | 9,48  | 30,59   | 235,72  | 6,83  | 6,39  | 10,43 | 76,11  | 1,67  | 7,69   | 445,02   | 0,02   | 0,02   | 0,05   | 4,92  | 85,33   | 87,40      | 56,14     | 43,14     | 62,25      | 50,57     | 51,96      |
| Standard error          | 0,17  | 1,14  | 5,01    | 9,43    | 1,05  | 0,82  | 0,75  | 3,37   | 0,40  | 0,05   | 17,37    | 0,02   | 0,01   | 0,02   | 0,40  | 7,63    | 6,54       | 8,18      | 12,26     | 8,38       | 15,10     | 9,93       |
| Mediana                 | 1,3   | 7,5   | 19      | 240,5   | 4     | 5     | 9     | 77     | 1     | 7,65   | 439,5    | 0      | 0      | 0      | 4,35  | 78,72   | 82,45      | 46,20     | 22,89     | 55,25      | 41,48     | 45,15      |
| Mode                    | 1,3   | 5     | 19      | 225     | 3     | 3     | 9     | 62     | 0     | 8,17   |          | 0      | 0      | 0      | 3,9   | 68,71   | 73,62      | 19,33     | 5,26      | 36,85      |           | 48,46      |
| Standard deviation      | 0,663 | 7,739 | 33,949  | 63,976  | 7,097 | 5,552 | 5,089 | 22,889 | 2,692 | 0,319  | 117,818  | 0,126  | 0,094  | 0,141  | 2,713 | 51,771  | 44,353     | 46,987    | 47,484    | 54,316     | 42,711    | 39,706     |
| Sample variance         | 0,44  | 59,90 | 1152,51 | 4092,87 | 50,37 | 30,82 | 25,90 | 523,92 | 7,25  | 0,10   | 13881,18 | 0,02   | 0,01   | 0,02   | 7,36  | 2680,21 | 1967,22    | 2207,78   | 2254,73   | 2950,19    | 1824,20   | 1576,55    |
| Kurtosis                | 0,519 | 2,062 | 5,717   | 1,264   | 3,057 | 1,903 | 2,205 | 0,502  | 7,550 | -1,347 | 1,369    | 40,327 | 27,752 | 17,303 | 3,580 | 1,736   | 1,401      | 2,557     | 0,533     | 2,468      | -1,040    | -0,121     |
| Skewness coeficient     | 0,961 | 1,546 | 2,443   | -0,765  | 1,837 | 1,393 | 1,286 | -0,458 | 2,558 | -0,059 | -0,391   | 6,248  | 5,107  | 4,034  | 1,769 | 1,183   | 1,061      | 1,627     | 1,266     | 1,496      | 0,666     | 0,790      |
| Range                   | 2,4   | 33    | 146     | 316     | 29    | 25    | 26    | 111    | 13    | 1,05   | 578      | 0,83   | 0,57   | 0,76   | 12,6  | 240,990 | 205,586    | 194,564   | 142,434   | 231,465    | 114,074   | 124,207    |
| Minimun                 | 0,6   | 1     | 2       | 54      | 0     | 0     | 2     | 17     | 0     | 7,13   | 115      | 0      | 0      | 0      | 1,5   | 0,440   | 11,627     | 0,928     | 3,447     | 0,321      | 2,887     | 1,113      |
| Maximun                 | 3     | 34    | 148     | 370     | 29    | 25    | 28    | 128    | 13    | 8,18   | 693      | 0,83   | 0,57   | 0,76   | 14,1  | 241,429 | 217,213    | 195,492   | 145,881   | 231,786    | 116,961   | 125,320    |
| Count                   | 15    | 46    | 46      | 46      | 46    | 46    | 46    | 46     | 46    | 46     | 46       | 46     | 46     | 46     | 46    | 46      | 46         | 33        | 15        | 42         | 8         | 16         |
| Confidence level(95,0%) | 0,37  | 2,30  | 10,08   | 19,00   | 2,11  | 1,65  | 1,51  | 6,80   | 0,80  | 0,09   | 34,99    | 0,04   | 0,03   | 0,04   | 0,81  | 15,37   | 13,17      | 16,66     | 26,30     | 16,93      | 35,71     | 21,16      |
