# Supplementary material
Source: MDPI journal article supplement (https://www.mdpi.com/2079-9276/12/1/14)
Supplement: s1 [file s1]

Table S1. Location of the sampled points and chemical analysis.

|          |                                              |       |        |           |            | mg/l |    |     |      |     |     |    |    |     |    |      | µS/cm |      | mg/l |      |      |  |  |
|----------|----------------------------------------------|-------|--------|-----------|------------|------|----|-----|------|-----|-----|----|----|-----|----|------|-------|------|------|------|------|--|--|
| Point Nº | Name                                         | Basin |        | Coor_X    | Coor_Y     | DQO  | Cl | SO4 | HCO3 | CO3 | NO3 | Na | Mg | Ca  | K  | pH   | C.E.  | NO2  | NH4  | PO4  | SiO2 |  |  |
| 2        | Río Covalagua                                | D     | River  | 406195.00 | 4735946.00 | 1,3  | 15 | 22  | 225  | 0   | 18  | 8  | 9  | 72  | 1  | 7,37 | 453   | 0,21 | 0    | 0    | 4,8  |  |  |
| 4        | Arroyo que desemboca en el Rudrón            | E     | Stream | 418749.00 | 4728415.00 | 2    | 11 | 29  | 211  | 0   | 3   | 12 | 11 | 62  | 1  | 7,48 | 382   | 0    | 0    | 0    | 4,2  |  |  |
| 6        | Manantial de la Cárcava                      | D     | Spring | 420995.00 | 4716061.00 | 0,8  | 8  | 9   | 59   | 0   | 1   | 5  | 2  | 18  | 6  | 7,55 | 115   | 0    | 0    | 0,13 | 13,4 |  |  |
| 7        | Fuenteodra                                   | D     | Stream | 409176.00 | 4725723.00 | 2,3  | 10 | 22  | 315  | 0   | 1   | 8  | 9  | 89  | 13 | 7,37 | 490   | 0    | 0,14 | 0    | 5,5  |  |  |
| 8        | Arroyo Congosto                              | D     | Stream | 399410.00 | 4726219.00 | 1,3  | 3  | 18  | 189  | 0   | 2   | 3  | 6  | 58  | 0  | 7,57 | 338   | 0    | 0    | 0    | 3,7  |  |  |
| 9        | Río Villova                                  | D     | River  | 395311.00 | 4726702.00 | 0,9  | 25 | 84  | 228  | 0   | 4   | 18 | 15 | 80  | 1  | 7,54 | 519   | 0    | 0    | 0    | 4,1  |  |  |
| 11       | Arroyo de las Udrías                         | D     | Stream | 394219.00 | 4730537.00 | 1    | 5  | 35  | 216  | 0   | 3   | 6  | 10 | 69  | 0  | 7,27 | 381   | 0    | 0    | 0    | 4,6  |  |  |
| 12       | Río Rubagón                                  | D     | River  | 398825.00 | 4743978.00 | 1,6  | 9  | 51  | 191  | 0   | 1   | 16 | 9  | 56  | 3  | 7,36 | 402   | 0    | 0,27 | 0    | 2,5  |  |  |
| 13       | Arroyo de Mundilla (Villaescobedo)           | E     | Stream | 411615.92 | 4733728.99 |      | 4  | 11  | 255  | 0   | 0   | 3  | 9  | 77  | 0  | 8,09 | 405   | 0    | 0    | 0    | 3,9  |  |  |
| 14       | Manantial de Fuentes (Barrio Panizares)      | E     | Spring | 420994.85 | 4730625.49 |      | 5  | 14  | 290  | 0   | 8   | 2  | 7  | 94  | 0  | 7,9  | 476   | 0    | 0    | 0    | 2,7  |  |  |
| 16       | Río Congostillo al Sur de talamillo del Tozo | D     | River  | 420915.85 | 4722224.65 |      | 9  | 19  | 325  | 0   | 11  | 3  | 18 | 94  | 1  | 7,86 | 556   | 0    | 0    | 0    | 5,7  |  |  |
| 17       | Manantial La Piedra                          | D     | Spring | 428291.55 | 4720613.47 |      | 9  | 2   | 255  | 0   | 8   | 3  | 21 | 52  | 4  | 7,91 | 428   | 0    | 0    | 0    | 4,9  |  |  |
| 19       | Manantial de La Recova (Urbel del Castillo)  | D     | Spring | 430615.26 | 4718635.97 |      | 7  | 12  | 241  | 0   | 7   | 0  | 6  | 80  | 0  | 8,11 | 406   | 0    | 0    | 0,15 | 2,8  |  |  |
| 20       | Fuente La Vieja (La Nuez de Arriba)          | D     | Spring | 433633.53 | 4716723.83 |      | 10 | 29  | 370  | 0   | 29  | 0  | 28 | 100 | 1  | 7,88 | 642   | 0    | 0    | 0    | 7,4  |  |  |
| 21       | Manantial a la salida de Acedillo            | D     | Spring | 428674.25 | 4713326.86 |      | 28 | 36  | 290  | 0   | 21  | 9  | 7  | 113 | 10 | 8,17 | 612   | 0    | 0    | 0,76 | 10,4 |  |  |
| 22       | Riachuelo en Coculina                        | D     | Stream | 426554.37 | 4714683.33 |      | 4  | 11  | 54   | 0   | 1   | 3  | 3  | 17  | 2  | 7,43 | 126   | 0    | 0    | 0    | 9,8  |  |  |
| 23       | 1er cauce crta de Reboledo de Traspeña       | D     | Stream | 406555.66 | 4726461.63 |      | 5  | 18  | 205  | 0   | 3   | 2  | 7  | 69  | 0  | 8,17 | 365   | 0    | 0    | 0    | 3    |  |  |
| 24       | Cauce km.13 Crta. Villadiego                 | D     | Stream | 413815.66 | 4719603.45 |      | 9  | 29  | 279  | 0   | 2   | 3  | 14 | 90  | 0  | 7,95 | 515   | 0    | 0    | 0    | 5,6  |  |  |
| 25       | Río de los Ordejones                         | D     | River  | 412822.65 | 4721907.81 |      | 9  | 36  | 271  | 0   | 0   | 4  | 13 | 90  | 0  | 7,91 | 513   | 0    | 0    | 0    | 6,1  |  |  |
| 26       | Arroyo Sahugillo                             | D     | Stream | 404056.36 | 4725729.05 |      | 1  | 12  | 174  | 0   | 4   | 0  | 4  | 61  | 0  | 8,17 | 318   | 0    | 0    | 0    | 2,5  |  |  |
| 27       | Arroyo de la Gargantilla                     | D     | Stream | 398291.18 | 4726663.95 |      | 13 | 19  | 309  | 0   | 3   | 5  | 8  | 103 | 4  | 8,02 | 540   | 0    | 0    | 0    | 8,2  |  |  |
| 28       | Río Congosto en Villela                      | D     | River  | 395383.01 | 4726743.22 |      | 27 | 45  | 282  | 0   | 3   | 13 | 16 | 96  | 1  | 7,93 | 584   | 0    | 0    | 0    | 5,5  |  |  |
| 29       | Río Pisuerga en Villela                      | D     | River  | 394270.94 | 4726498.19 |      | 8  | 21  | 145  | 0   | 2   | 7  | 8  | 44  | 0  | 8,01 | 286   | 0    | 0    | 0    | 1,5  |  |  |
| 30       | Río Ritobas en crta PP-2134                  | D     | River  | 393891.97 | 4735029.29 |      | 9  | 148 | 187  | 0   | 3   | 3  | 18 | 99  | 0  | 8,02 | 579   | 0    | 0    | 0    | 2    |  |  |
| 31       | Arroyo Vaíllo en crta Aguilar                | D     | Stream | 390896.22 | 4737492.09 |      | 6  | 12  | 287  | 0   | 4   | 2  | 8  | 89  | 0  | 7,93 | 477   | 0    | 0    | 0    | 5,1  |  |  |
| 32       | Río Vegalizán en crta Aguilar                | D     | River  | 390123.67 | 4737020.73 |      | 5  | 20  | 272  | 0   | 5   | 2  | 10 | 83  | 1  | 8,18 | 456   | 0    | 0    | 0,14 | 5,1  |  |  |
| 33       | Arroyo de Cozuelos (Cozuelos de Ojeda)       | D     | Stream | 386023.4  | 4734568.89 |      | 4  | 11  | 294  | 0   | 11  | 2  | 5  | 95  | 0  | 7,98 | 437   | 0    | 0    | 0    | 5,6  |  |  |
| 34       | Arroyo Riachillo (Cozuelos)                  | D     | Stream | 385325.81 | 4734235.21 |      | 5  | 15  | 281  | 0   | 13  | 3  | 7  | 94  | 1  | 7,92 | 440   | 0    | 0    | 0,15 | 6,5  |  |  |
| 35       | Río Lucio (Villallano)                       | D     | River  | 398616.86 | 4735558.45 |      | 15 | 24  | 289  | 0   | 2   | 6  | 14 | 90  | 2  | 8,03 | 486   | 0    | 0    | 0    | 4,5  |  |  |
| 36       | Río Monegro (Santa María de Mave)            | D     | River  | 395632.11 | 4730709.91 |      | 34 | 15  | 282  | 0   | 9   | 14 | 10 | 97  | 3  | 7,96 | 525   | 0    | 0    | 0    | 7,3  |  |  |
| 41       | Arroyo del Alambre                           | D     | Stream | 405459.59 | 4731904.5  |      | 5  | 36  | 232  | 0   | 8   | 5  | 10 | 76  | 1  | 7,29 | 450   | 0    | 0    | 0    | 2,6  |  |  |
| 42       | Manantial de la Pisadera                     | D     | Spring | 405471.88 | 4731903.46 |      | 1  | 129 | 241  | 0   | 9   | 4  | 19 | 105 | 1  | 7,18 | 596   | 0    | 0    | 0    | 5,4  |  |  |
| 47       | Arroyo de Las Solanas                        | D     | Stream | 413812.31 | 4726408.25 |      | 26 | 48  | 332  | 0   | 25  | 7  | 13 | 128 | 6  | 7,54 | 685   | 0,83 | 0,57 | 0,55 | 4,1  |  |  |
| 48       | Fuente de San Bol                            | E/D   | Spring | 415391.23 | 4725515.96 |      | 1  | 10  | 197  | 0   | 6   | 0  | 7  | 62  | 0  | 7,63 | 339   | 0    | 0    | 0    | 2,8  |  |  |
| 49       | Río Camesa                                   | D     | River  | 398351.18 | 4735973.94 |      | 15 | 33  | 129  | 0   | 4   | 13 | 10 | 39  | 3  | 7,64 | 321   | 0    | 0    | 0    | 3,9  |  |  |
| 56       | Orbaneja-M-2                                 | E     | Spring | 435219.21 | 4742739.16 |      | 6  | 15  | 257  | 0   | 5   | 9  | 10 | 70  | 0  | 7,65 | 462   | 0    | 0    | 0    | 2,9  |  |  |
| 57       | Río Rudrón en Valdelateja                    | E     | River  | 437203.19 | 4736055.39 |      | 4  | 5   | 225  | 0   | 11  | 6  | 10 | 64  | 0  | 7,71 | 394   | 0    | 0    | 0    | 2,4  |  |  |
| 58       | Pozo Azul                                    | E     | Spring | 434848.52 | 4731780.63 |      | 3  | 6   | 239  | 0   | 28  | 8  | 9  | 74  | 0  | 7,56 | 427   | 0    | 0    | 0    | 3,4  |  |  |

|    |                                         |   |        |           |            |      |    |     |     |   |    |    |    |    |   |      |     |   |   |      |      |
|----|-----------------------------------------|---|--------|-----------|------------|------|----|-----|-----|---|----|----|----|----|---|------|-----|---|---|------|------|
| 62 | Manantial de la Toba (Tubilla del Agua) | E | Spring | 434241.5  | 4728432.59 |      | 13 | 6   | 204 | 0 | 10 | 11 | 9  | 56 | 0 | 7,33 | 403 | 0 | 0 | 0    | 3,2  |
| 64 | Balneario Valdelateja (M-2)             | E | Spring | 436479.45 | 4735723.27 | 0,6  | 7  | 7   | 240 | 0 | 0  | 5  | 8  | 67 | 4 | 7,16 | 400 | 0 | 0 | 0,12 | 14,1 |
| 66 | Río Rudrón en Barrio Panizares          | E | River  | 421114.03 | 4729977.05 | 1,9  | 3  | 5   | 264 | 0 | 7  | 2  | 5  | 84 | 0 | 7,33 | 435 | 0 | 0 | 0    | 2,2  |
| 67 | Río Hurón (entrada a Cueva del Agua)    | E | River  | 418991.06 | 4729128.29 | 3    | 14 | 19  | 246 | 0 | 3  | 10 | 8  | 77 | 1 | 7,45 | 445 | 0 | 0 | 0,16 | 5,2  |
| 68 | Río Rugabón                             | D | River  | 396951.47 | 4745085.03 | 1,9  | 6  | 78  | 160 | 0 | 2  | 19 | 12 | 54 | 4 | 7,48 | 439 | 0 | 0 | 0    | 3,9  |
| 69 | Manantial de Peñalonga                  | D | Spring | 395987,31 | 4738941,02 | 1    | 16 | 144 | 229 | 0 | 7  | 25 | 20 | 98 | 2 | 7,13 | 693 | 0 | 0 | 0    | 5,2  |
| 71 | Manantial de Barriolucio                | D | Spring | 411365.43 | 4727538.11 | 1,12 | 2  | 19  | 201 | 0 | 3  | 3  | 9  | 62 | 0 | 7,42 | 376 | 0 | 0 | 0    | 2,9  |
| 72 | Fuente Urbel                            | D | River  |           |            | 0,9  | 2  | 18  | 176 | 0 | 4  | 2  | 9  | 54 | 0 | 7,35 | 354 | 0 | 0 | 0    | 3,1  |
